# Supplementary material
Source: HighWire-hosted journal article supplement (https://www.jneurosci.org/highwire/filestream/600420/field_highwire_adjunct_files/0/Supplemental_Tables.pdf)
Supplement: Supplemental_Tables.pdf [file Supplemental_Tables.pdf]

Table 1: Mean Amplitudes ( $\mu\text{V}$ ) and peak latencies (ms) for evoked beta, alpha and theta band activity during encoding at posterior and anterior electrodes for normal controls (NC) and patients with early onset schizophrenia (EOS). SE= Standard Error. Effect sizes (Cohen's *d*) are calculated for significant group differences.

|                                 |     | Mean Amplitude (SE) |             |             | Latency (SE) |          |          |
|---------------------------------|-----|---------------------|-------------|-------------|--------------|----------|----------|
| Evoked Beta activity (12-30 Hz) |     |                     |             |             |              |          |          |
| Posterior                       |     | Load1               | Load2       | Load3       | Load1        | Load2    | Load3    |
|                                 | NC  | 8,73 (1,79)         | 7,31 (1,87) | 2,64 (1,55) | 171 (25)     | 195 (21) | 184 (18) |
|                                 | EOS | 0,92 (1,57)         | 3,05 (1,98) | 3,72 (2,41) | 185 (26)     | 178 (24) | 148 (26) |
| Effect Size                     | (d) | 1,24                | 0,59        | -0,14       |              |          |          |
| Anterior                        | NC  | 7,76 (2,21)         | 4,94 (2,27) | 6,85 (2,03) | 185 (21)     | 176 (24) | 210 (25) |
|                                 | EOS | 2,76 (1,21)         | 0,98 (1,46) | 3,98 (1,17) | 157 (19)     | 138 (20) | 176 (25) |
| Effect Size                     | (d) | 0,75                | 0,55        | 0,46        |              |          |          |
| Evoked Alpha activity (8-12 Hz) |     |                     |             |             |              |          |          |
| Posterior                       | NC  | 1,87 (0,45)         | 2,5 (0,55)  | 2,58 (0,66) | 185 (12)     | 174 (27) | 206 (15) |
|                                 | EOS | 0,53 (0,42)         | 1,15 (0,59) | 1,35 (0,68) | 202 (32)     | 166 (32) | 242 (34) |
| Effect Size                     | (d) | 0,82                | 0,63        | 0,49        |              |          |          |
| Anterior                        | NC  | 2,03 (0,5)          | 2,31 (0,54) | 1,89 (0,56) | 266 (31)     | 227 (23) | 242 (24) |
|                                 | EOS | 0,79 (0,46)         | 0,85 (0,47) | 1,15 (0,36) | 274 (30)     | 205 (26) | 242 (34) |
| Effect Size                     | (d) | 0,69                | 0,77        | 0,42        |              |          |          |
| Evoked Theta activity (3-7 Hz)  |     |                     |             |             |              |          |          |
| Posterior                       | NC  | 5,82 (0,55)         | 4,9 (0,66)  | 4,32 (0,65) | 272 (15)     | 191 (15) | 246 (20) |
|                                 | EOS | 3,2 (0,47)          | 3,56 (0,69) | 4,33 (0,76) | 238 (17)     | 251 (17) | 236 (19) |
| Effect Size                     | (d) | 1,37                | 0,53        | -0,004      |              |          |          |
| Anterior                        | NC  | 6,48 (0,74)         | 4,55 (0,43) | 5,31 (0,63) | 250 (22)     | 273 (20) | 304 (18) |
|                                 | EOS | 4,18 (0,62)         | 2,56 (0,54) | 4,32 (0,73) | 268 (21)     | 289 (26) | 292 (23) |
| Effect Size                     | (d) | 0,9                 | 1.09        | 0.39        |              |          |          |

Table 2: Mean Amplitudes ( $\mu\text{V}$ ) and latencies (ms) for induced alpha band (10-13 Hz) activity and induced gamma band (55-100 Hz) activity for the delay time period between 500-2500 ms and between 2500-4500 ms following stimulus offset at posterior and anterior electrodes for normal controls (NC) and patients with early onset schizophrenia (EOS). SE= Standard Error

|                                         |     | Mean Amplitude (SE) |             |             | Latency (SE) |            |            |
|-----------------------------------------|-----|---------------------|-------------|-------------|--------------|------------|------------|
| Induced Alpha activity (500 – 2500 ms)  |     |                     |             |             |              |            |            |
| Posterior                               |     | Load1               | Load2       | Load3       | Load1        | Load2      | Load3      |
|                                         | NC  | 2,46 (0,63)         | 5,97 (1,26) | 5,72 (1,07) | 1756 (176)   | 1655 (135) | 1913 (141) |
|                                         | EOS | 3,59 (0,58)         | 4,76 (1,04) | 4,53 (1,19) | 1501 (158)   | 1661 (187) | 1780 (163) |
| Anterior                                | NC  | 1,03 (0,44)         | 2,97 (0,46) | 2,75 (0,54) | 1507 (212)   | 1876 (165) | 1710 (153) |
|                                         | EOS | 1,91 (0,38)         | 2,37 (0,97) | 1,80 (0,55) | 1259 (155)   | 1525 (199) | 1583 (162) |
| Induced Alpha activity (2500 – 4500 ms) |     |                     |             |             |              |            |            |
| Posterior                               | NC  | 3,20 (0,59)         | 7,43 (1,92) | 6,89 (1,41) | 3318 (172)   | 3350 (175) | 3171 (193) |
|                                         | EOS | 3,83 (0,79)         | 6,01 (1,37) | 5 (1,26)    | 3484 (152)   | 3497 (194) | 3636 (171) |
| Anterior                                | NC  | 1,6 (0,61)          | 3,68 (0,8)  | 3,22 (0,79) | 3386 (170)   | 3480 (183) | 3505 (181) |
|                                         | EOS | 1,98 (0,52)         | 2,57 (0,97) | 1,86 (0,55) | 3685 (174)   | 3499 (186) | 3529 (137) |
| Induced Gamma activity (500 – 2500 ms)  |     |                     |             |             |              |            |            |
| Posterior                               | NC  | 0,85 (0,22)         | 1,09 (0,27) | 1,33 (0,28) | 1703 (186)   | 1444 (176) | 1434 (164) |
|                                         | EOS | 1,2 (0,39)          | 1,4 (0,22)  | 1,77 (0,44) | 1812 (160)   | 1452 (156) | 1708 (135) |
| Anterior                                | NC  | 0,98 (0,25)         | 1,61 (0,35) | 1,69 (0,51) | 1627 (192)   | 1653 (185) | 1743 (154) |
|                                         | EOS | 1,06 (0,45)         | 1,72 (0,25) | 1,85 (0,45) | 1923 (124)   | 1762 (145) | 1583 (148) |
| Induced Gamma activity (2500 –4500 ms)  |     |                     |             |             |              |            |            |
| Posterior                               | NC  | 1,26 (0,25)         | 1,06 (0,19) | 2,1 (0,56)  | 3517 (153)   | 3474 (203) | 3468 (170) |
|                                         | EOS | 1,73 (0,4)          | 2,36 (0,54) | 1,99 (0,59) | 3366 (178)   | 3661 (139) | 3368 (140) |
| Anterior                                | NC  | 1,77 (0,54)         | 1,63 (0,35) | 3,23 (0,99) | 3482 (140)   | 3579 (204) | 3565 (155) |
|                                         | EOS | 1,67 (0,4)          | 3,08 (0,68) | 2,28 (0,8)  | 3619 (167)   | 3486 (153) | 3426 (130) |

Table 3: Mean Amplitudes ( $\mu\text{V}$ ) and latencies (ms) for evoked (top) and induced (middle) theta (3-7 Hz) and gamma (55-100 Hz) (bottom) band activity at posterior and anterior electrodes for the time period between 200-600 ms and 200-800 ms, respectively, following the probe stimulus for normal controls (NC) and patients with early onset schizophrenia (EOS). SE= Standard Error. Effect sizes (Cohen's  $d$ ) are calculated for significant group differences.

|                        |             | Peak Amplitude (SE) |             |             | Latency (SE) |          |          |
|------------------------|-------------|---------------------|-------------|-------------|--------------|----------|----------|
| Evoked theta activity  |             |                     |             |             |              |          |          |
| Posterior              |             | Load1               | Load2       | Load3       | Load1        | Load2    | Load3    |
|                        | NC          | 6,37 (0,58)         | 6,05 (0,51) | 5,91 (0,71) | 275 (17)     | 271 (20) | 257 (14) |
|                        | EOS         | 5,16 (0,72)         | 4,47 (0,47) | 5,64 (0,62) | 241 (13)     | 269 (24) | 227 (14) |
| Effect Size            | (d)         | 0,49                | 0,86        | 0,11        |              |          |          |
| Anterior               | NC          | 8,01 (0,9)          | 7,11 (0,92) | 7,11 (0,89) | 241 (11)     | 255 (12) | 249 (12) |
|                        | EOS         | 4,7 (0,57)          | 4,59 (0,79) | 5,59 (0,76) | 249 (22)     | 269 (22) | 243 (21) |
|                        | Effect Size | (d)                 | 1,18        | 0,79        | 0,49         |          |          |
| Induced Theta activity |             |                     |             |             |              |          |          |
| Posterior              |             | Load1               | Load2       | Load3       | Load1        | Load2    | Load3    |
|                        | NC          | 4,86 (0,5)          | 2,31 (0,46) | 4,35 (0,52) | 305 (19)     | 303 (22) | 285 (14) |
|                        | EOS         | 3,37 (0,75)         | 1,77 (0,61) | 1,94 (0,45) | 345 (30)     | 321 (29) | 295 (21) |
| Effect Size            | (d)         | 0,62                | 0,27        | 1,32        |              |          |          |
| Anterior               | NC          | 7,54 (0,75)         | 7,4 (0,65)  | 6,76 (0,62) | 337 (16)     | 369 (25) | 335 (19) |
|                        | EOS         | 5,17 (0,92)         | 4,16 (1,0)  | 3,86 (0,67) | 367 (29)     | 333 (28) | 357 (33) |
|                        | Effect Size | (d)                 | 0,76        | 1,02        | 1,2          |          |          |
| Induced Gamma activity |             |                     |             |             |              |          |          |
| Posterior              | NC          | 1,75 (0,23)         | 1,64 (0,21) | 1,54 (0,19) | 401 (49)     | 498 (58) | 462 (50) |
|                        | EOS         | 1,19 (0,23)         | 0,96 (0,24) | 1 (0,22)    | 514 (55)     | 540 (60) | 508 (65) |
| Effect Size            | (d)         | 0,86                | 0,81        | 0,7         |              |          |          |
| Anterior               | NC          | 1,38 (0,25)         | 1,25 (0,21) | 1,38 (0,23) | 349 (42)     | 564 (54) | 482 (49) |
|                        | EOS         | 0,77 (0,21)         | 0,68 (0,23) | 0,75 (0,18) | 478 (62)     | 427 (66) | 442 (57) |
| Effect Size            | (d)         | 0,72                | 0,69        | 0,82        |              |          |          |
